# Supplementary material for: Aptamer-based kinetically controlled DNA reactions coupled with metal–organic framework nanoprobes for sensitive detection of SARS-CoV-2 spike protein
Source: Royal Society of Chemistry journal article supplement (doi:10.1039/d3ay01585h), 2023-01-01
Supplement: d3ay01585h1.pdf [file d3ay01585h1.pdf]

## Supplementary Information

# **Aptamer-based kinetically-controlled DNA reactions coupled with metal-organic framework nanoprobcs for sensitive detection of SARS-CoV-2 spike protein**

Yan Liu,<sup>a</sup> Yuanlin Zhou,<sup>a</sup> Wanting Xu,<sup>a</sup> Jiarong Li,<sup>b</sup> Shuning Wang,<sup>c</sup> Xiaojia Shen,<sup>a</sup> Xiaobin Wen<sup>a</sup>  
and Li Liu<sup>a,\*</sup>

<sup>a</sup> Department of Pediatrics, Chengdu Second People's Hospital, Chengdu 610021, Sichuan,  
China

<sup>b</sup> College of Clinical Medicine, Southwest Medical University, Luzhou 646000, Sichuan, China

<sup>c</sup> School of Life Sciences, Shanghai University, Shanghai 200444, China

---

\* Corresponding author. E-mail: excellent2120@163.com.

**Table S1** Sequences of DNA probes used in this work

| DNA probe     | Sequence (from 5' to 3')                                                |
|---------------|-------------------------------------------------------------------------|
| AP            | CTTGATCAGGATAAGTTCAAGGCGGGTTCCTAGACTTGTACTCAGCCT<br>CTGTTGCAACTGTA      |
| BHQ-AP        | CTTGATCAGGAT(BHQ)AAGTTCAAGGCGGGTTCCTAGACTTGTACTCA<br>GCCTCTGTTGCAACTGTA |
| Random DNA    | CTTGATCAGGATAAGTTCAGTGGAAAGTTGGACGGGATTGCCTGTTGCA<br>ACTGTA             |
| SP            | CTTATCCTGATCAAGCTCACAG                                                  |
| Biotin-SP     | CTTATCCTGATCAAGCTCACAG-biotin                                           |
| FAM-SP        | FAM-CTTATCCTGATCAAGCTCACAG                                              |
| FAM-SP-biotin | FAM-CTTATCCTGATCAAGCTCACAG-biotin                                       |
| TP            | TACAGTTGCTTTCTTATCCTGATCA                                               |
| rTP           | TTGCTGCTGCTTGACACATTAATGC                                               |
| F-DNA         | FAM-CTTGATCAGGATAAG                                                     |

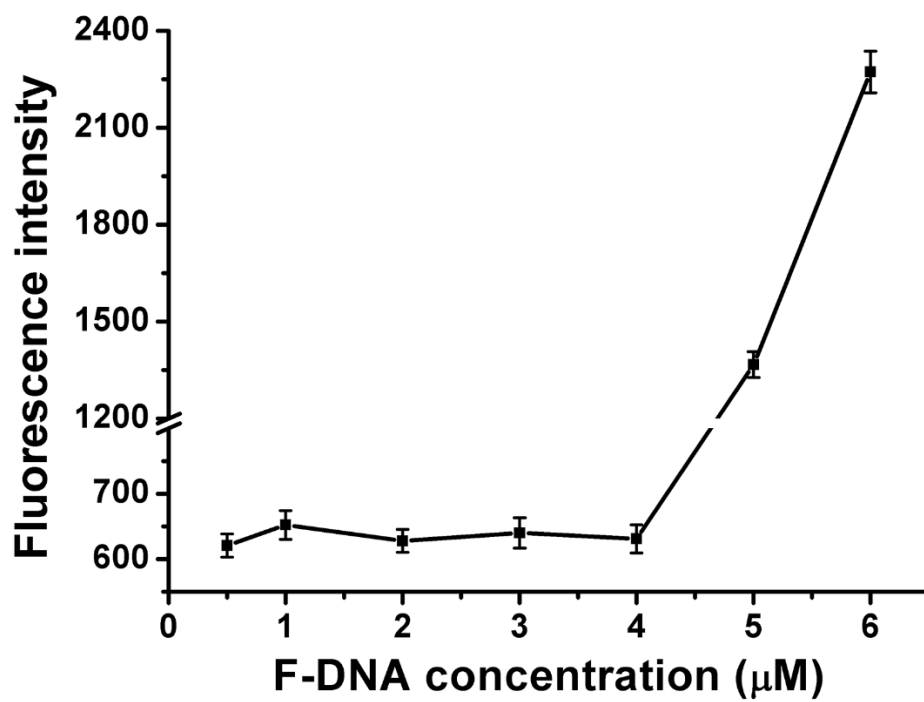

**Fig. S1** Fluorescence responses obtained after incubating 50 µL of UiO-66-NH<sub>2</sub> with 50 µL of different concentrations of F-DNA.

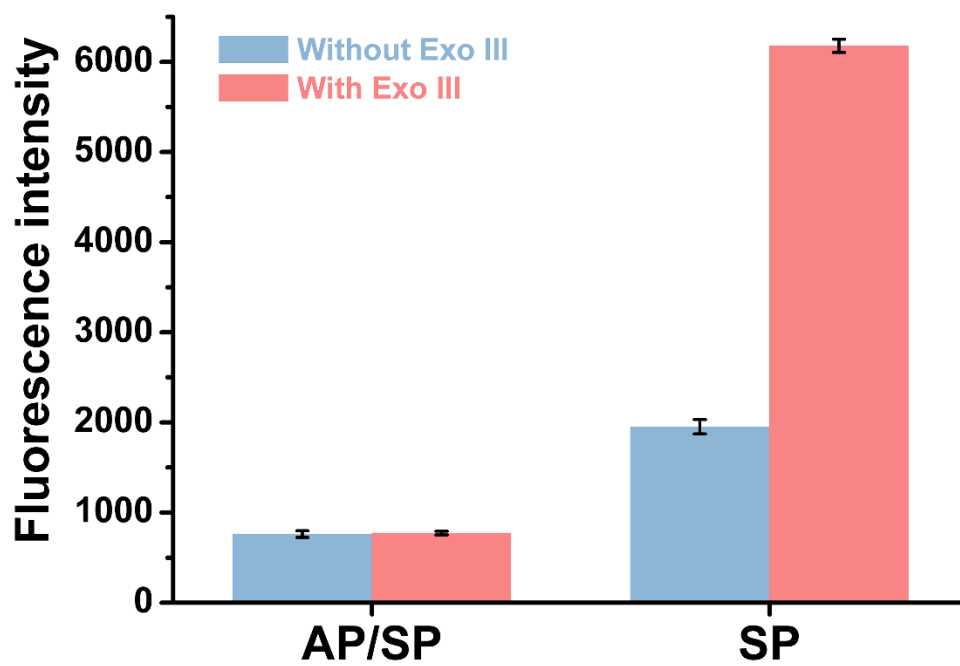

Fig. S2 Fluorescence responses of F-DNA@MOF after incubation with AP/SP or SP in the absence and presence of Exo III.

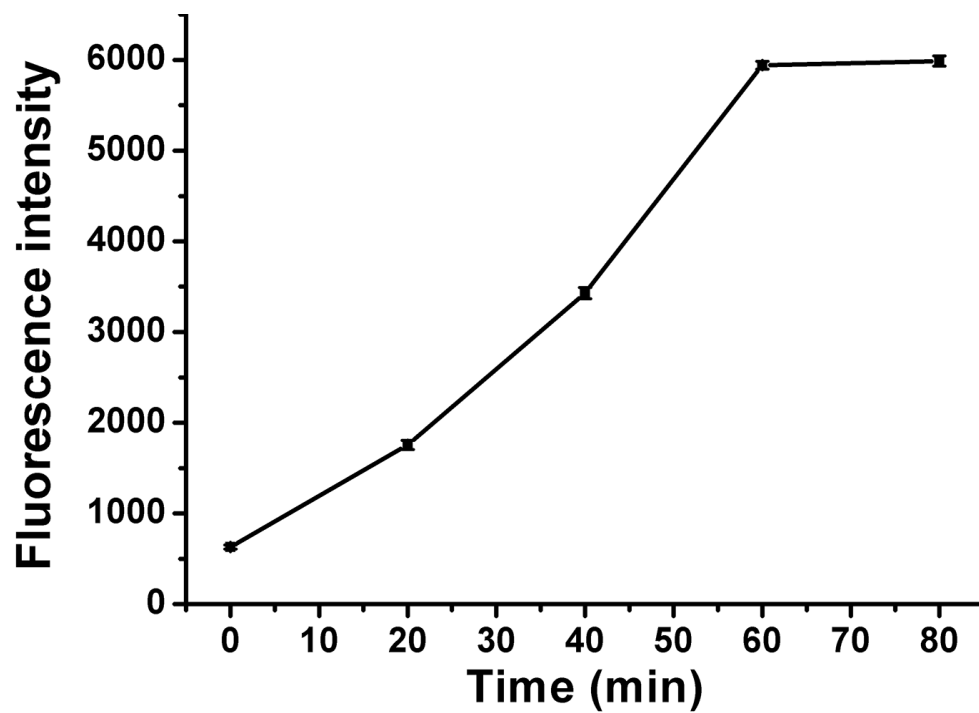

**Fig. S3** Optimization of the reaction time for aptamer-based kinetically-controlled DNA displacement.

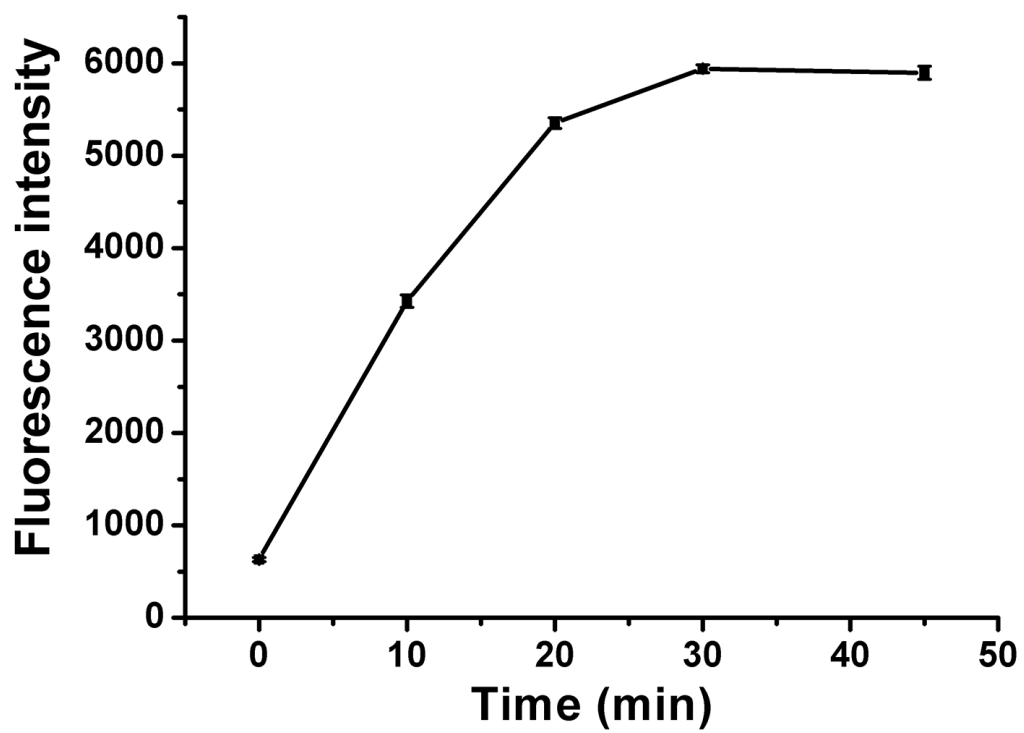

Fig. S4 Optimization of the reaction time for Exo III-fuelled DNA reaction.

**Table S2** Comparison of currently available aptamer-based methods for the detection of SARS-CoV-2 spike protein.

| Method                                                                                                        | Mechanism                           | Materials            | Assay time | Linear range                                          | LOD                      | Real sample              | Ref  |
|---------------------------------------------------------------------------------------------------------------|-------------------------------------|----------------------|------------|-------------------------------------------------------|--------------------------|--------------------------|------|
| Mxene-based fluorescent method                                                                                | Target-induced direct signal change | Mxene                | 30 min     | 100 fg mL <sup>-1</sup> to 1 ng mL <sup>-1</sup>      | 38.9 fg mL <sup>-1</sup> | Clinical swab samples    | [S1] |
| Fluorescent method based on allosteric aptasensor-initiated target cycling and transcription amplification    | Target-regulated strand competition | /                    | 180 min    | 5.07 ng mL <sup>-1</sup> to 76.05 ng mL <sup>-1</sup> | 5.07 ng mL <sup>-1</sup> | Artificial serum sample  | [S2] |
| Near-infrared fluorescent method based on covalent DNA anchors                                                | Target-induced direct signal change | Carbon nanotube      | 30 min     | Not provided                                          | 38 ng mL <sup>-1</sup>   | Artificial saliva sample | [S3] |
| Electrochemical method based on triangular prism DNA nanostructures and dumbbell hybridization chain reaction | Target-regulated strand competition | Triangular DNA prism | 135 min    | 1 pg mL <sup>-1</sup> to 1 ng mL <sup>-1</sup>        | 38 fg mL <sup>-1</sup>   | Clinical swab samples    | [S4] |
| Electrochemical method based on aptamer-binding induced multiple hairpin assembly signal amplification        | Target-regulated strand competition | /                    | 75 min     | 50 fg mL <sup>-1</sup> to 50 ng mL <sup>-1</sup>      | 9.79 fg mL <sup>-1</sup> | Artificial swab sample   | [S5] |
| Aptamer-based method based on                                                                                 | Target-induced                      | Gold                 | 40 min     | 507 pg mL <sup>-1</sup>                               | 66 pg                    | SARS-CoV-2               | [S6] |

|                                                                                    |                                                          |              |         |  |                                                  |                         |                                    |           |
|------------------------------------------------------------------------------------|----------------------------------------------------------|--------------|---------|--|--------------------------------------------------|-------------------------|------------------------------------|-----------|
| electrochemical impedance spectroscopy                                             | direct signal change                                     | nanoparticle |         |  | to 1.27 $\mu\text{g mL}^{-1}$                    | $\text{mL}^{-1}$        | pseudovirus                        |           |
| Fluorescent method based on kinetically-controlled DNA reactions and MOF nanoprobe | Target-regulated kinetically-controlled DNA displacement | MOF          | 110 min |  | 10 fg $\text{mL}^{-1}$ to 10 ng $\text{mL}^{-1}$ | 7.8 fg $\text{mL}^{-1}$ | Artificial saliva and serum sample | This work |

## References

- S1. Y. Luo, X. Jiang, R. Zhang, C. Shen, M. Li, Z. Zhao, M. Lv, S. Sun, X. Sun and B. Ying. *Small*, 2023, **19**, 2301146.
- S2. D. Song, D. Yuan, X. Tan, L. Li, H. He, L. Zhao, G. Yang, S. Pan, H. Dai, X. Song and Y. Zhao. *Sens. Actuators B Chem.*, 2022, **371**, 132526.
- S3. J. T. Metternich, J. A. C. Wartmann, L. Sistemich, R. Nibler, S. Herberitz and S. Kruss. *J. Am. Chem. Soc.*, 2023, **145**, 14776-14783.
- S4. Y. Jiang, X. Chen, N. Feng and P. Miao. *Anal. Chem.*, 2022, **94**, 14755-14760.
- S5. J. Xue, Y. Li, J. Liu, Z. Zhang, R. Yu, Y. Huang, C. Li, A. Chen and J. Qiu. *Talanta*, 2022, **248**, 123605.
- S6. J. C. Abrego-Martinez, M. Jafari, S. Chergui, C. Pavel, D. Che and M. Siaj. *Biosens. Bioelectron.*, 2022, **195**, 113595.



**Table S3** Comparison of SARS-CoV-2 spike protein concentrations detected in saliva samples by the method and the standard given concentrations.

| Sample | Detected                  |         | Standard concentration   | Recovery (%) |
|--------|---------------------------|---------|--------------------------|--------------|
|        | Concentration             | RSD (%) |                          |              |
| 1      | 103.6 fg mL <sup>-1</sup> | 3.71    | 100 fg mL <sup>-1</sup>  | 103.6        |
| 2      | 97.6 pg mL <sup>-1</sup>  | 4.26    | 100 pg mL <sup>-1</sup>  | 97.6         |
| 3      | 1047 pg mL <sup>-1</sup>  | 4.08    | 1000 pg mL <sup>-1</sup> | 104.7        |

**Table S4** Comparison of SARS-CoV-2 spike protein concentrations detected in serum samples by the method and the standard given concentrations.

| Sample | Detected                  |         | Standard concentration   | Recovery (%) |
|--------|---------------------------|---------|--------------------------|--------------|
|        | Concentration             | RSD (%) |                          |              |
| 1      | 101.7 fg mL <sup>-1</sup> | 4.96    | 100 fg mL <sup>-1</sup>  | 101.7        |
| 2      | 105.3 pg mL <sup>-1</sup> | 2.82    | 100 pg mL <sup>-1</sup>  | 105.3        |
| 3      | 1069 pg mL <sup>-1</sup>  | 4.82    | 1000 pg mL <sup>-1</sup> | 106.9        |
